# Supplementary material for: Analyzing PKC Gamma (+ 19,506 A/G) polymorphism as a promising genetic marker for HCV-induced hepatocellular carcinoma
Source: PubMed Central journal article supplement (PMC9714225; doi:10.1186/s40364-022-00437-6), 2022-11-30
Supplement: 40364_2022_437_MOESM1_ESM.pdf [file 40364_2022_437_MOESM1_ESM.pdf]

## Analyzing PKC Gamma (+19506 A/G) Polymorphism as a Promising Genetic Marker for HCV-induced Hepatocellular Carcinoma

Fizzah Abid<sup>1</sup>, Talha Iqbal<sup>1</sup>, Khushbukhat Khan<sup>1</sup>, Yasmin Badshah<sup>1</sup>, Janeen H, Trembley<sup>2,3,4</sup>, Kanza Shahid<sup>1</sup>, Sameen Zafar<sup>1</sup>, Amna Hafeez<sup>1</sup>, Naila Khan<sup>1</sup>, Naeem Mahmood Ashraf<sup>5</sup>, Maria Shabbir<sup>1\*</sup>, Tayyaba Afsar<sup>6</sup>, Ali Almajwal<sup>6</sup>, Nawaf W. Alruwaili<sup>6</sup>, Suhail Razak<sup>6\*</sup>.

**Table S2:** Pathogenic nsSNPs based on six different tools

| Variant           | PredictSNP2 | CADD        | DANN        | FATHMM      | FunSeq2     | GWAVA       |
|-------------------|-------------|-------------|-------------|-------------|-------------|-------------|
| 19:53882640, G→C  | Deleterious | Deleterious | Deleterious | Deleterious | Deleterious | Deleterious |
| 19: 53882648, T→A | Neutral     | Deleterious | Neutral     | Neutral     | Deleterious | Deleterious |
| 19: 53889693, G→A | Deleterious | Deleterious | Deleterious | Neutral     | Deleterious | Deleterious |
| 19: 53889719, G→A | Deleterious | Deleterious | Deleterious | Deleterious | Deleterious | Deleterious |
| 19: 53889734, G→C | Deleterious | Deleterious | Neutral     | Deleterious | Deleterious | Nil         |
| 19: 53889743, T→A | Deleterious | Deleterious | Deleterious | Deleterious | Deleterious | Nil         |
| 19: 53889743, T→C | Deleterious | Deleterious | Deleterious | Deleterious | Deleterious | Nil         |
| 19: 53889901, T→A | Neutral     | Deleterious | Neutral     | Neutral     | Deleterious | Deleterious |
| 19: 53889936, T→C | Deleterious | Deleterious | Deleterious | Deleterious | Deleterious | Nil         |
| 19: 53889963, G→A | Deleterious | Deleterious | Deleterious | Neutral     | Deleterious | Nil         |
| 19: 53889963, G→T | Deleterious | Deleterious | Deleterious | Deleterious | Deleterious | Nil         |
| 19: 53898095, A→G | Deleterious | Deleterious | Deleterious | Deleterious | Deleterious | Deleterious |
| 19: 53898097, G→A | Deleterious | Deleterious | Deleterious | Deleterious | Deleterious | Deleterious |
| 19: 53900612, G→T | Deleterious | Deleterious | Neutral     | Deleterious | Deleterious | Deleterious |
| 19: 53906342, G→A | Deleterious | Deleterious | Deleterious | Deleterious | Deleterious | Deleterious |
| 19: 53906729, T→C | Neutral     | Deleterious | Deleterious | Neutral     | Deleterious | Nil         |



**Supplementary Table S1: Genotype data of all participants from both pat  
HCC SAMPLES**

| <b>Age</b> | <b>Gender</b> | <b>viral load</b> | <b>ALT</b> | <b>AA</b> | <b>GG</b> | <b>AG</b> |
|------------|---------------|-------------------|------------|-----------|-----------|-----------|
| 44         | M             | 847539383         | 102        | +         | -         | -         |
| 42         | F             | 61700             | 92         | +         | -         | -         |
| 38         | M             | 39000             | 74         | +         | -         | -         |
| 51         | M             | 673000            | 85         | +         | -         | -         |
| 27         | M             | 847579493         | 117        | +         | -         | -         |
| 52         | F             | 8485748           | 94         | +         | -         | -         |
| 24         | F             | 8857749           | 169        | -         | -         | +         |
| 43         | M             | 948585730         | 66         | +         | -         | -         |
| 32         | M             | 39485580          | 91         | +         | -         | -         |
| 55         | F             | 9488843           | 75         | +         | -         | -         |
| 43         | M             | 394984478         | 95         | +         | -         | -         |
| 46         | F             | 8373723           | 61         | +         | -         | -         |
| 58         | M             | 921874654         | 125        | -         | -         | +         |
| 35         | F             | 83746339          | 66         | +         | -         | -         |
| 32         | F             | 8384743           | 67         | -         | -         | +         |
| 35         | F             | 938374            | 69         | +         | -         | -         |
| 63         | F             | 7293837           | 103        | +         | -         | -         |
| 29         | M             | 3943857403        | 193        | -         | -         | +         |
| 32         | M             | 847583930         | 183        | +         | -         | -         |
| 38         | M             | 74637839          | 75         | +         | -         | -         |
| 50         | M             | 836465493         | 78         | +         | -         | -         |
| 50         | M             | 93848745          | 81         | +         | -         | -         |
| 40         | F             | 9384750           | 81         | +         | -         | -         |
| 29         | F             | 3738493           | 84         | +         | -         | -         |
| 25         | F             | 8484883           | 84         | +         | -         | -         |
| 35         | F             | 9382746           | 88         | -         | -         | +         |
| 27         | M             | 833202938         | 172        | -         | -         | +         |
| 52         | F             | 347593            | 92         | +         | -         | -         |
| 43         | M             | 821939475         | 173        | -         | -         | +         |
| 14         | M             | 624403938         | 92         | +         | -         | -         |
| 32         | M             | 83747338          | 145        | +         | -         | -         |
| 42         | F             | 657448            | 210        | +         | -         | -         |
| 42         | M             | 475730200         | 153        | -         | -         | +         |
| 43         | M             | 938475653         | 104        | -         | -         | +         |
| 29         | F             | 364908323         | 129        | +         | -         | -         |
| 72         | M             | 7439298437        | 132        | +         | -         | -         |
| 25         | F             | 83949202          | 98         | -         | -         | +         |
| 46         | F             | 843292034         | 103        | +         | -         | -         |
| 35         | M             | 747362392         | 106        | -         | +         | -         |
| 26         | M             | 73298473          | 92         | +         | -         | -         |
| 45         | F             | 87000             | 94         | +         | -         | -         |

|    |   |            |     |   |   |   |
|----|---|------------|-----|---|---|---|
| 55 | M | 39400      | 110 | + | - | - |
| 42 | M | 73700      | 72  | - | - | + |
| 36 | F | 3543110    | 14  | + | - | - |
| 32 | F | 74332282   | 57  | + | - | - |
| 32 | M | 736231     | 91  | - | - | + |
| 45 | F | 262000     | 87  | - | + | - |
| 55 | M | 246000     | 79  | + | - | - |
| 39 | F | 893700     | 62  | + | - | - |
| 30 | M | 1360000    | 97  | + | - | - |
| 55 | M | 72109832   | 153 | - | - | + |
| 31 | F | 63228289   | 94  | + | - | - |
| 26 | F | 7464939    | 73  | + | - | - |
| 30 | F | 79000      | 82  | + | - | - |
| 49 | F | 7438282922 | 110 | - | - | + |
| 38 | F | 873290109  | 96  | + | - | - |
| 33 | M | 978000     | 132 | + | - | - |
| 40 | F | 73218943   | 89  | - | + | - |
| 35 | F | 8587584    | 90  | + | - | - |
| 42 | F | 9484844    | 78  | + | - | - |
| 34 | F | 9484843    | 104 | + | - | - |
| 49 | F | 1179300    | 97  | + | - | - |
| 30 | F | 63922304   | 127 | - | + | - |
| 34 | M | 948757483  | 149 | + | - | - |
| 25 | F | 67333929   | 89  | - | + | - |
| 52 | M | 38380024   | 124 | + | - | - |
| 36 | M | 89000345   | 392 | + | - | - |
| 32 | F | 7439202    | 138 | - | + | - |
| 32 | F | 890073     | 97  | + | - | - |
| 39 | M | 7320922    | 64  | + | - | - |
| 47 | M | 119740     | 31  | + | - | - |
| 23 | M | 1167390    | 84  | + | - | - |
| 50 | M | 73020103   | 87  | + | - | - |
| 58 | M | 643000     | 56  | + | - | - |
| 48 | M | 493807     | 69  | - | - | + |
| 33 | M | 92721      | 45  | + | - | - |
| 59 | F | 1643000    | 98  | - | - | + |
| 37 | F | 84700      | 61  | - | - | + |
| 46 | M | 84878493   | 109 | - | + | - |
| 40 | M | 9488494    | 93  | - | - | + |
| 50 | M | 49000      | 220 | + | - | - |
| 40 | M | 63939434   | 126 | - | + | - |
| 45 | F | 283843186  | 210 | + | - | - |
| 52 | M | 48844833   | 82  | + | - | - |
| 49 | M | 94944432   | 98  | + | - | - |

|    |   |           |     |   |   |   |
|----|---|-----------|-----|---|---|---|
| 23 | F | 21000     | 149 | + | - | - |
| 41 | F | 746363832 | 71  | + | - | - |
| 35 | F | 300000    | 48  | - | + | - |
| 40 | M | 189000    | 51  | + | - | - |
| 38 | M | 763500    | 179 | - | - | + |
| 34 | F | 73000     | 93  | + | - | - |
| 58 | M | 66337489  | 57  | - | + | - |
| 32 | F | 737338839 | 132 | + | - | - |
| 40 | M | 970000    | 95  | + | - | - |
| 45 | F | 78300     | 162 | + | - | - |
| 32 | F | 4646737   | 179 | + | - | - |
| 50 | M | 113276    | 291 | + | - | - |
| 45 | F | 647900    | 92  | - | + | - |
| 40 | F | 76300     | 115 | + | - | - |
| 36 | F | 5647747   | 61  | + | - | - |

oints and control group.

**CONTROLS**

| <u>Age</u> | <u>Gender</u> | <u>ALT</u> | <b>AA</b> | <b>GG</b> | <b>AG</b> |
|------------|---------------|------------|-----------|-----------|-----------|
| 51         | M             | 35         | -         | +         | -         |
| 27         | M             | 41         | -         | +         | -         |
| 52         | F             | 27         | +         | -         | -         |
| 24         | F             | 29         | -         | +         | -         |
| 43         | M             | 36         | -         | +         | -         |
| 32         | M             | 45         | -         | +         | -         |
| 55         | F             | 23         | +         | -         | -         |
| 43         | M             | 37         | -         | -         | +         |
| 46         | F             | 57         | -         | +         | -         |
| 43         | M             | 28         | -         | +         | -         |
| 35         | F             | 49         | -         | +         | -         |
| 32         | F             | 38         | -         | +         | -         |
| 35         | F             | 34         | -         | +         | -         |
| 63         | F             | 39         | -         | +         | -         |
| 29         | M             | 35         | -         | +         | -         |
| 32         | M             | 35         | -         | -         | +         |
| 38         | M             | 30         | +         | -         | -         |
| 50         | M             | 41         | -         | -         | +         |
| 40         | F             | 35         | -         | -         | +         |
| 42         | F             | 41         | -         | +         | -         |
| 25         | F             | 25         | -         | +         | -         |
| 35         | F             | 37         | -         | +         | -         |
| 27         | M             | 29         | -         | +         | -         |
| 25         | F             | 41         | +         | -         | -         |
| 43         | M             | 44         | -         | +         | -         |
| 14         | M             | 38         | -         | -         | +         |
| 32         | M             | 51         | -         | -         | +         |
| 42         | F             | 45         | +         | -         | -         |
| 43         | M             | 37         | -         | -         | +         |
| 29         | F             | 43         | -         | -         | +         |
| 53         | M             | 47         | -         | +         | -         |
| 25         | F             | 57         | -         | +         | -         |
| 46         | F             | 39         | -         | +         | -         |
| 35         | M             | 16         | -         | +         | -         |
| 26         | M             | 32         | -         | +         | -         |
| 45         | F             | 49         | -         | +         | -         |
| 42         | M             | 51         | -         | +         | -         |
| 36         | F             | 45         | +         | -         | -         |
| 32         | F             | 91         | +         | -         | -         |
| 55         | M             | 29         | -         | -         | +         |
| 39         | F             | 38         | -         | -         | +         |

|    |   |    |   |   |   |
|----|---|----|---|---|---|
| 65 | M | 29 | + | - | - |
| 55 | M | 40 | + | - | - |
| 42 | F | 29 | + | - | - |
| 26 | F | 36 | - | - | + |
| 49 | F | 45 | - | - | + |
| 38 | F | 23 | - | + | - |
| 33 | M | 37 | + | - | - |
| 40 | F | 57 | - | + | - |
| 35 | F | 28 | - | - | + |
| 86 | F | 49 | - | - | + |
| 34 | F | 38 | - | - | + |
| 49 | F | 34 | - | + | - |
| 30 | F | 39 | - | - | + |
| 34 | M | 35 | - | - | + |
| 73 | F | 35 | - | - | + |
| 52 | M | 30 | - | - | + |
| 36 | M | 41 | - | - | + |
| 32 | F | 35 | - | - | + |
| 62 | F | 41 | - | - | + |
| 39 | M | 29 | + | - | - |
| 47 | F | 36 | - | - | + |
| 23 | M | 45 | - | - | + |
| 50 | M | 23 | + | - | - |
| 74 | F | 37 | - | - | + |
| 64 | M | 57 | - | - | + |
| 33 | M | 28 | + | - | - |
| 59 | F | 49 | + | - | - |
| 46 | M | 38 | + | - | - |
| 40 | M | 34 | - | - | + |
| 50 | M | 39 | + | - | - |
| 40 | M | 35 | - | - | + |
| 45 | F | 35 | + | - | - |
| 52 | M | 30 | - | - | + |
| 49 | M | 41 | - | - | + |
| 23 | F | 18 | + | - | - |
| 41 | F | 28 | - | - | + |
| 35 | F | 32 | + | - | - |
| 40 | M | 31 | - | - | + |
| 38 | M | 33 | - | + | - |
| 34 | F | 29 | - | - | + |
| 58 | M | 31 | - | + | - |
| 32 | F | 31 | - | - | + |
| 32 | F | 32 | - | - | + |
| 50 | M | 33 | - | - | + |

|    |   |    |   |   |   |
|----|---|----|---|---|---|
| 45 | F | 32 | + | - | - |
| 40 | F | 30 | + | - | - |
| 36 | F | 29 | + | - | - |
| 44 | M | 30 | + | - | - |
| 42 | F | 33 | + | - | - |
| 38 | M | 26 | - | - | + |
| 50 | F | 26 | - | + | - |
| 42 | M | 31 | - | - | + |
| 55 | F | 57 | - | + | - |
| 32 | M | 37 | + | - | - |
| 45 | F | 53 | + | - | - |
| 30 | F | 41 | + | - | - |
| 37 | F | 39 | + | - | - |
| 40 | M | 27 | + | - | - |
| 45 | F | 40 | + | - | - |
